# Supplementary material
Source: PubMed Central journal article supplement (PMC3968298)

**Supplementary Figure 1: Morphological database of reconstructed pyramidal neurons.**

Pyramidal cell reconstructions. Cell bodies and dendrites in red, axons in blue.

**Supplementary Figure 2: Morphological database of reconstructed Layer 2/3 PV neurons.**

Layer 2/3 PV cell reconstructions. Cell bodies and dendrites in red, axons in blue.

**Supplementary Figure 3: Morphological database of reconstructed Layer 5 PV neurons.**

Layer 5 PV cell reconstructions. Cell bodies and dendrites in red, axons in blue.

**Supplementary Figure 4: Morphological database of reconstructed SOM neurons.**

Layer 2/3 SOM cell reconstructions. Cell bodies and dendrites in red, axons in blue.

**Supplementary Figure 5: Reconstructed connected pairs of SOM-PC neurons**

Somatostatin cell and pyramidal cell pairs. Somatostatin cell bodies and dendrites in black, axons in blue. Pyramidal cell bodies and dendrites in red, axons in orange.

**Supplementary Figure 6: Reconstructed connected pairs of PV-PC neurons**

Parvalbumin cell and pyramidal cell pairs. Somatostatin cell bodies and dendrites in black, axons in blue. Pyramidal cell bodies and dendrites in red, axons in orange.

Supplemental Figure 1

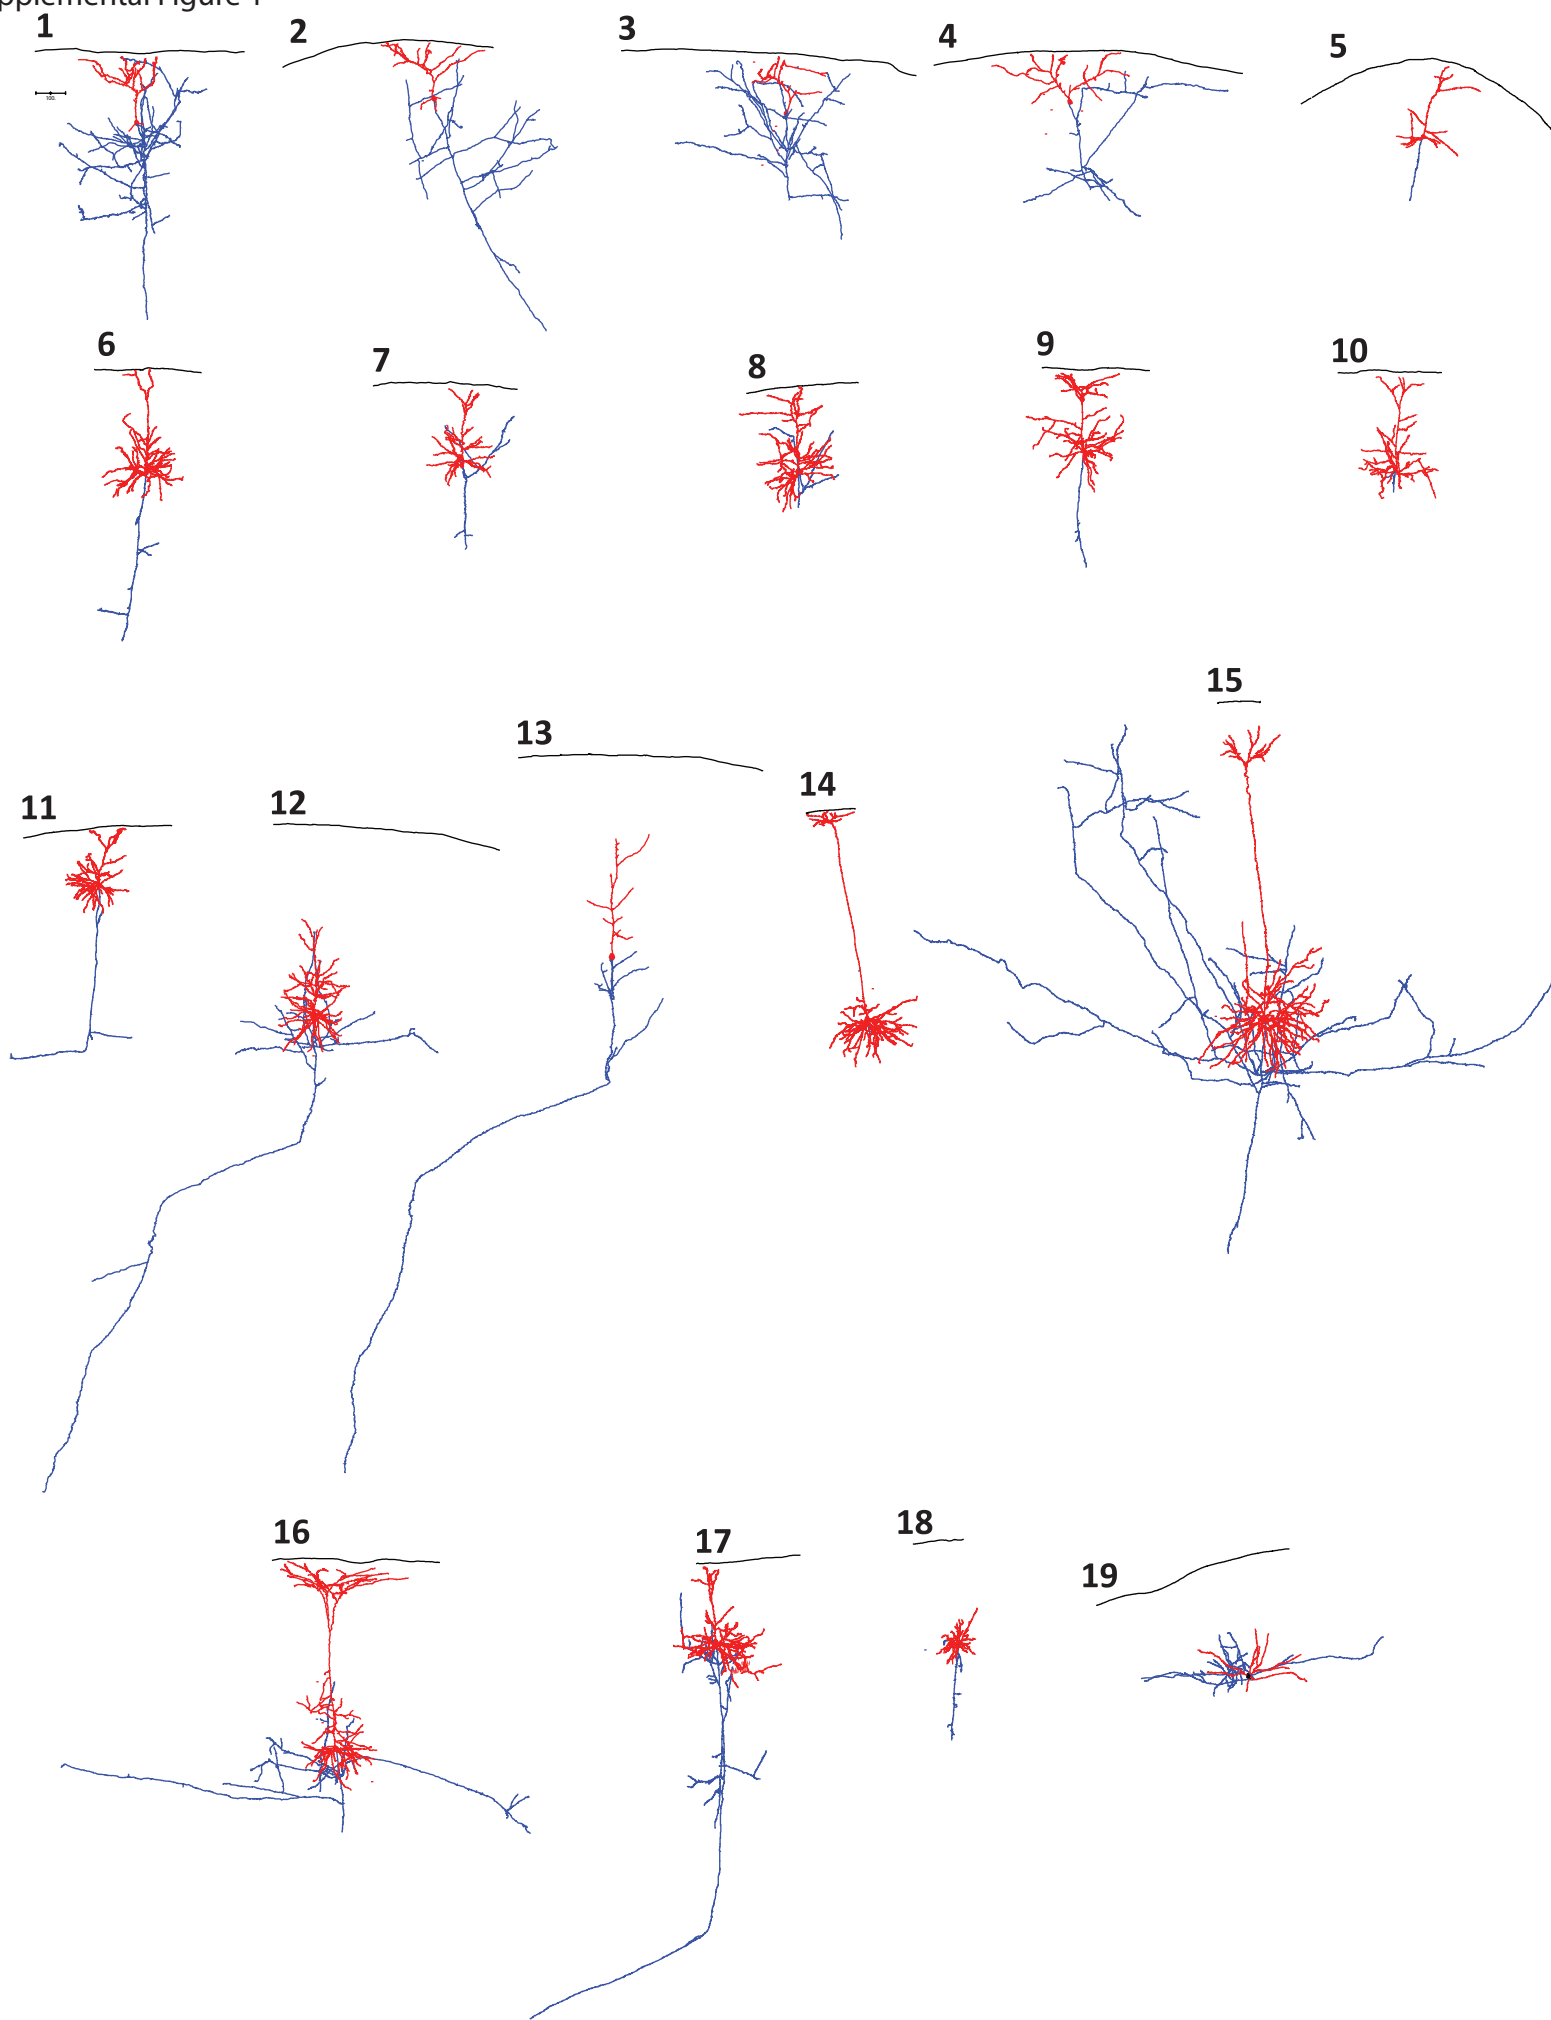

**20**

100

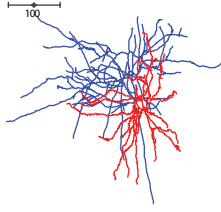

**21**

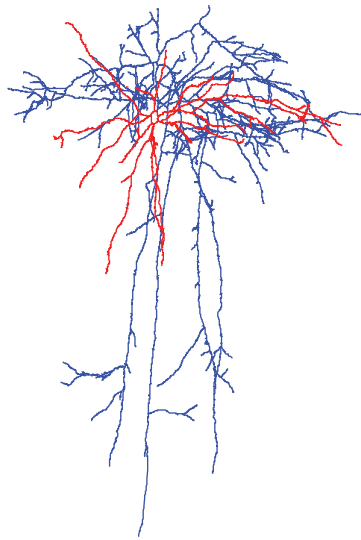

**22**

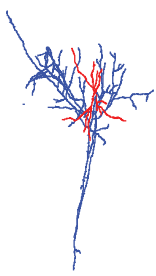

**23**

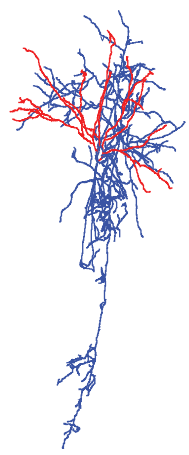

**24**

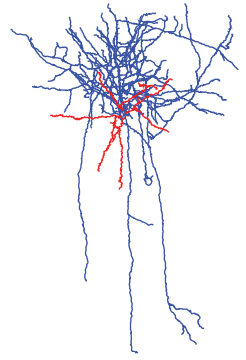

**25**

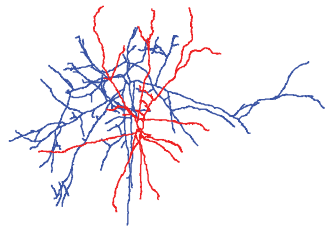

**26**

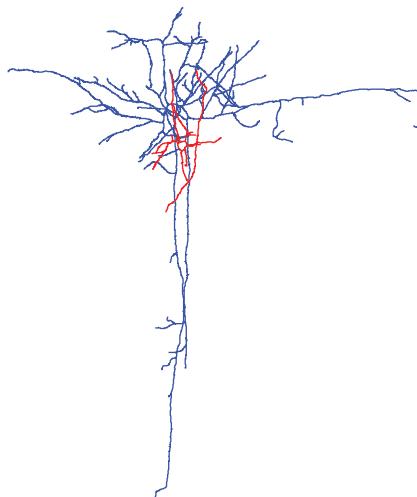

**27**

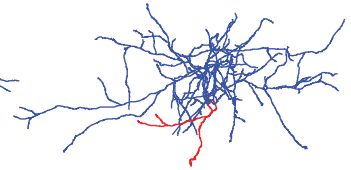

**28**

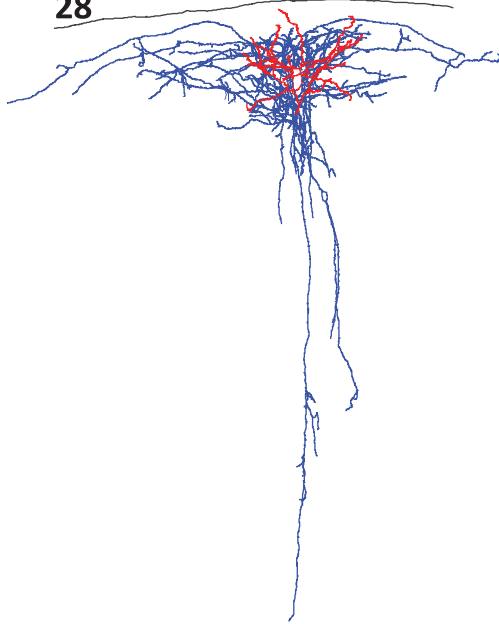

**29**

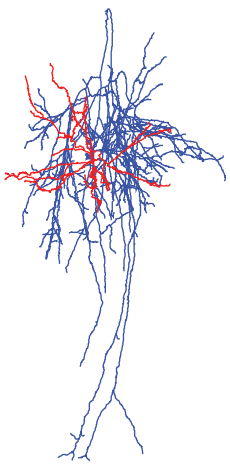

**30**

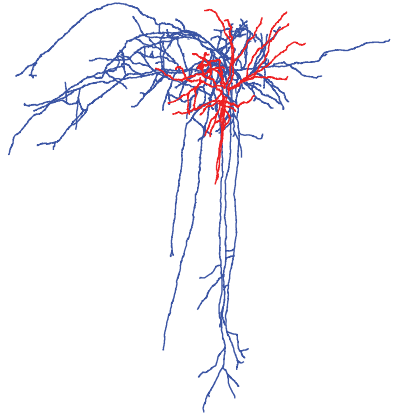

31

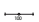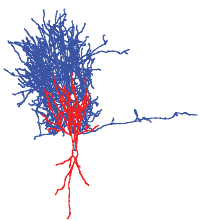

32

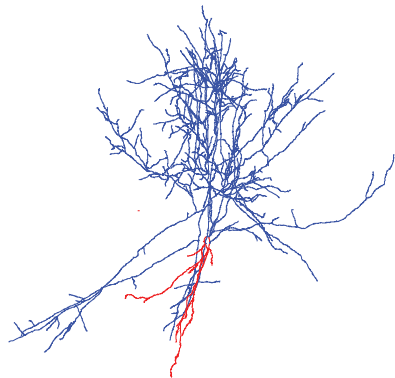

33

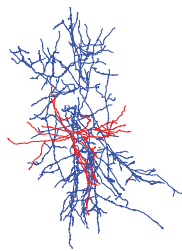

34

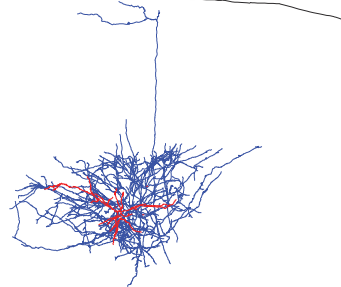

Supplemental Figure 4

**35**

100

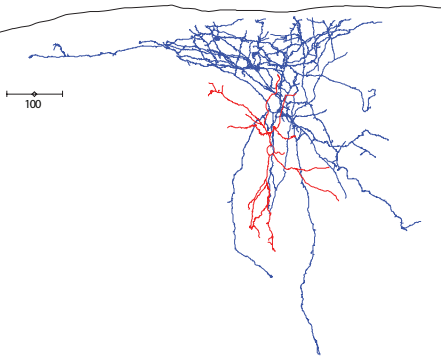

**36**

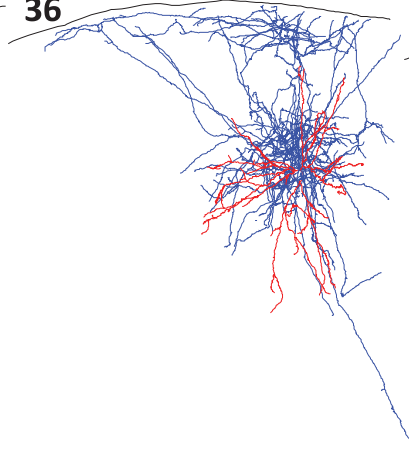

**37**

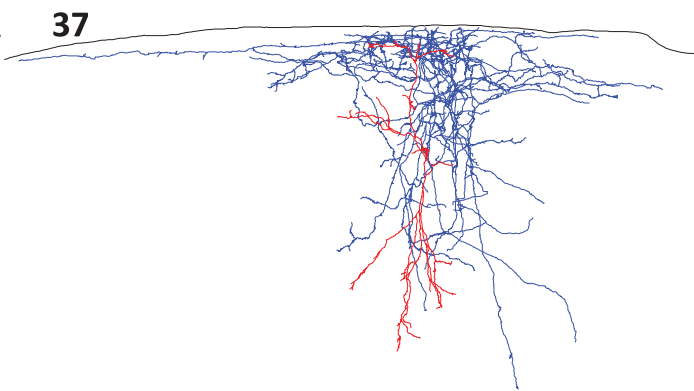

**38**

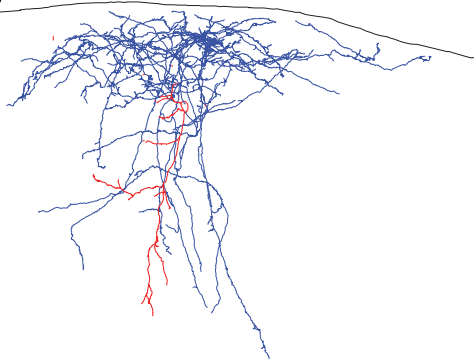

**39**

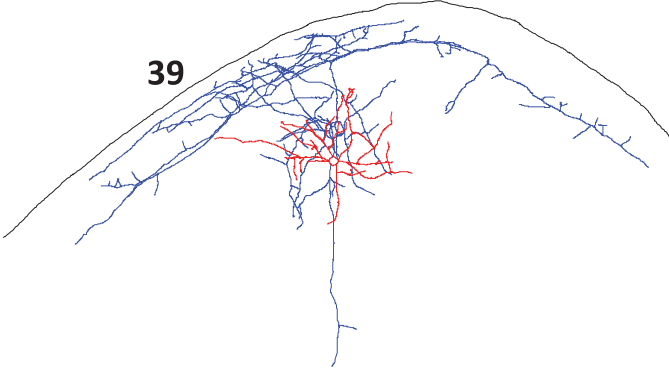

Supplemental Figure 5

**1, 35**

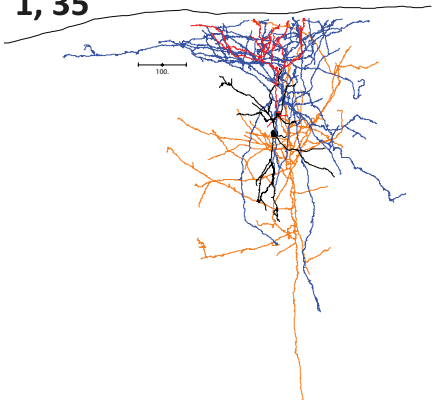

**2, 36**

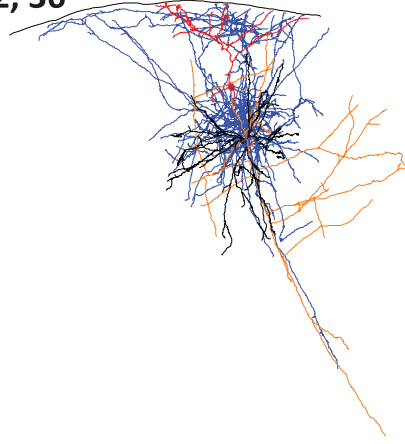

**3, 37**

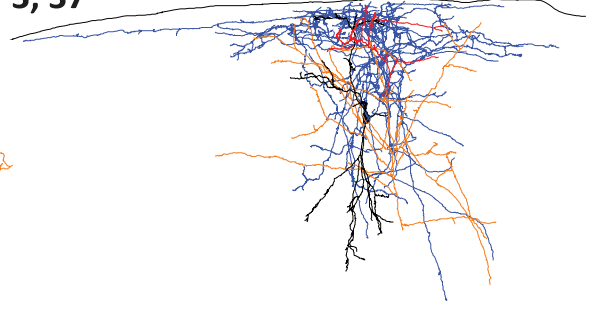

**4, 38**

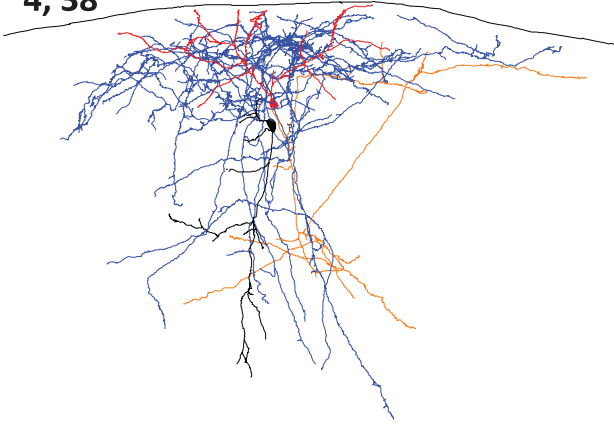

Supplemental Figure 6

**6, 23**

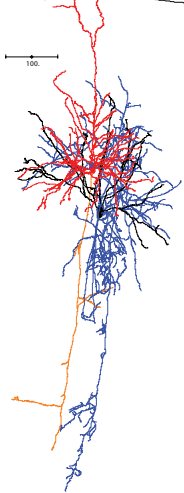

**7, 24**

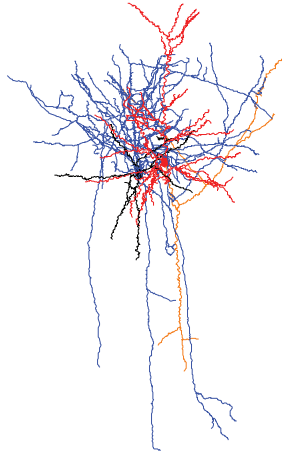

**8, 25**

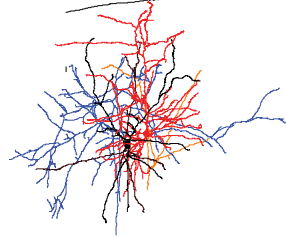

**9, 27**

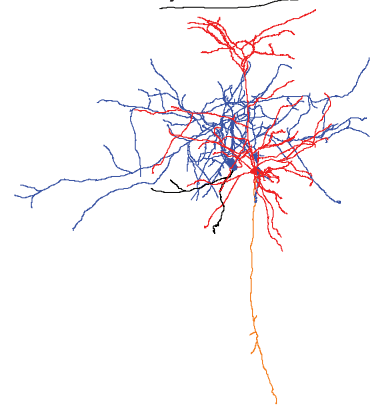

**10, 29**

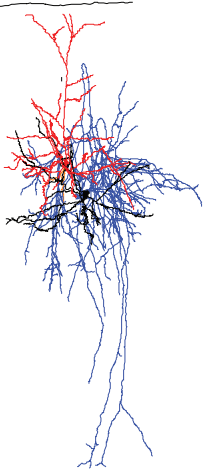

**11, 30**

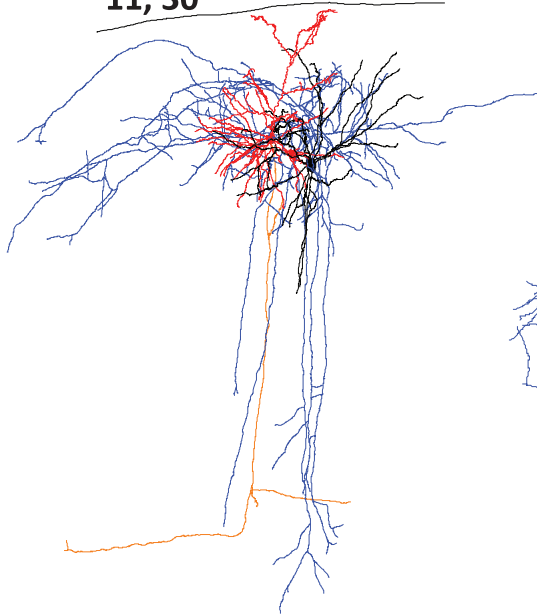

**12, 34**

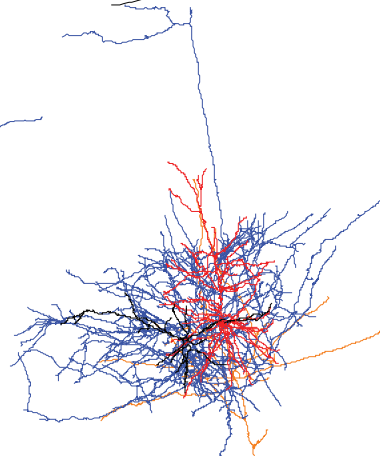

**13, 34**

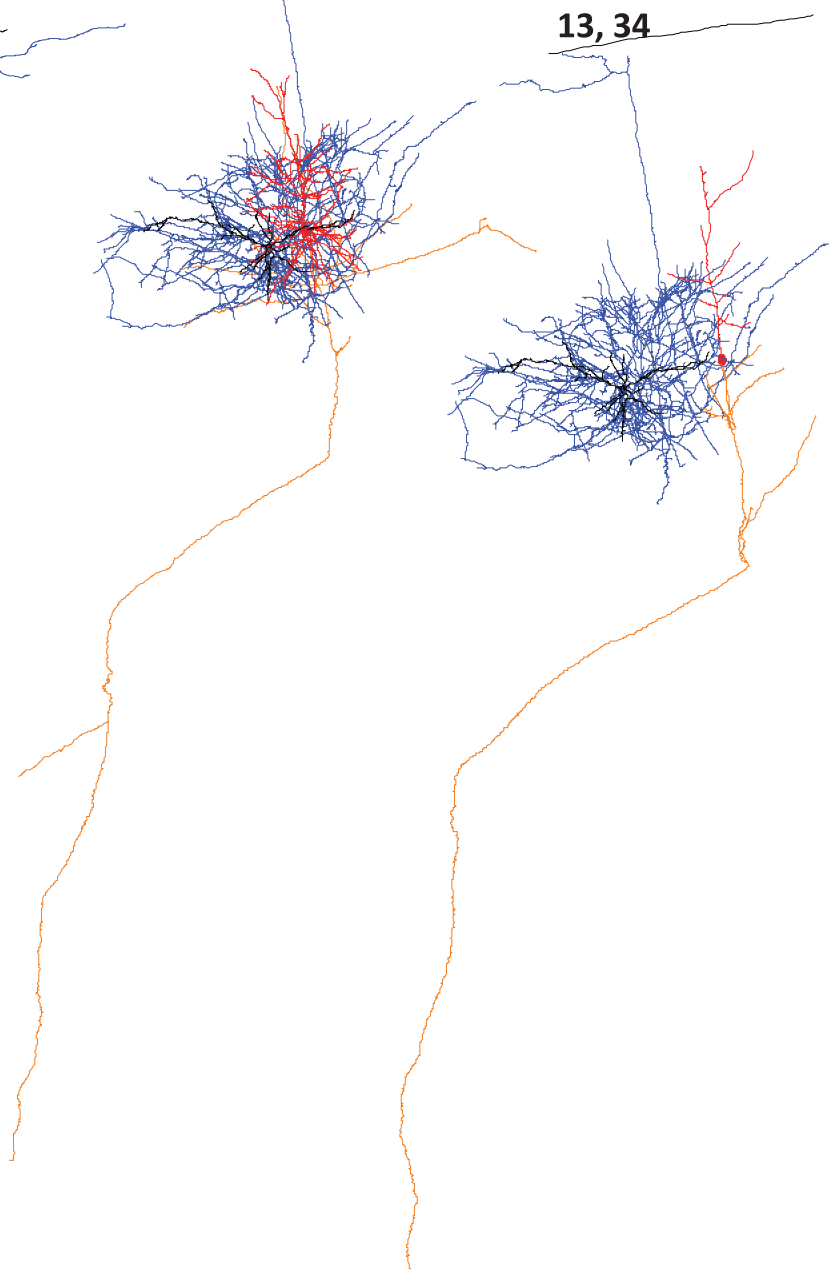

Supplement: supp_bhs210_bhs210supp.pdf [file supp_bhs210_bhs210supp.pdf]
